# Supplementary material for: MoP nanocrystals encapsulated in N-doped three-dimensional carbon networks for efficient hydrogen evolution electrocatalysis
Source: Royal Society of Chemistry journal article supplement (doi:10.1039/d3nj05629e), 2024-01-01
Supplement: d3nj05629e1.pdf [file d3nj05629e1.pdf]

## Electronic Supplementary Information

### MoP nanocrystals encapsulated in N-doped three-dimensional carbon networks for efficient hydrogen evolution electrocatalysis

Yang Yu<sup>a†</sup>, Ling Jiang<sup>b\*†</sup>, Xinxin Zhang<sup>a</sup>, Tiansui Zhang<sup>a</sup>, Shiyin Zhang<sup>b</sup>, Yanting Wu<sup>b</sup>, Dong Liu<sup>b</sup>, Dequan Liu<sup>b</sup>, Hongfang Liu<sup>a\*</sup>, Haitao Wang<sup>c\*</sup>

<sup>a</sup> School of Chemistry and Chemical Engineering, Huazhong University of Science and Technology, Wuhan 430074 China

<sup>b</sup> CCCC Second Harbour Engineering Company Design & Research Institute Co., Ltd., Wuhan 430056, China

<sup>c</sup> School of Chemistry and Environmental Engineering, Wuhan Institute of Technology, Wuhan 430205, China.

#### \* Corresponding Author

E-mail: wanghaitao@wit.edu.cn (H. Wang); peggyjl@qq.com (L. Jiang); liuhf@hust.edu.cn (H. Liu).

† These authors contributed equally to this work.

## Characterization

The as-fabricated hybrids were characterized by a Bruker D8 Discover X-ray diffractometer, Cu K $\alpha$  radiation ( $\lambda = 1.5418 \text{ \AA}$ ), scanning electron microscopy (SEM: FEI, Nova 154 NanoSEM 450) and transmission electron microscopy (TEM: Talos-155 f200s)). The specific surface area and pore-size distribution were tested by nitrogen adsorption-desorption measurement (TriStar II 3020 analyzer) at 77 K. The X-ray photoelectron spectra (XPS) were conducted on an AXIS-ULTRA DLD-600W instrument (Shimadzu- Kratos Co. Ltd.). Raman shifts were recorded on a VERTEX 70 spectrometry instrument (Bruker). ICP-AES (Perkin-Elmer Optima 4300DV) and elemental analysis (Vario EL Cube CHNSO Elemental Analyzer) were used to determine the composition and elemental ratio for the obtained materials.

## Electrochemical Measurements

The electrochemical properties of all samples were measured by using a CHI 760E electrochemical workstation (Chenhua, Shanghai) in a typical three-electrode system at room temperature. The GCE modified with different samples, a saturated calomel electrode (SCE, in 0.5 M H<sub>2</sub>SO<sub>4</sub>) and a graphite rod were used as the working electrode, reference electrode, and auxiliary electrode, respectively.

To prepare the working electrode, 5 mg of the catalyst was dispersed in a solution of 980  $\mu\text{L}$  of ethanol mixed with 20  $\mu\text{L}$  of 5 wt % Nafion solution and then sonicated for 1h to form the homogeneous dispersion. Then, 6  $\mu\text{L}$  of the catalyst ink was dropwise casted on the surface of the glass carbon electrode (GCE, 3 mm) with a mass loading of 0.38 mg cm<sup>-1</sup>.

Cyclic voltammetry (CV), linear sweep voltammetry (LSV), and amperometric  $i-t$  curve were

carried out to investigate the electrochemical performances of the working electrode. All the measured potentials were iR-corrected and calibrated to RHE ( $E_{\text{(RHE)}} = E_{\text{(SCE)}} + 0.241 \text{ V} + 0.059 \text{ pH}$ ). Electrochemical impedance spectroscopy (EIS) for HER was carried out in the frequency range of 100 kHz-0.1 Hz with an AC amplitude of 10 mV using an Autolab Potentiostat Galvanostat (PGSTAT302N). In addition, cyclic voltammetry (CV) was conducted at a non-Faradaic region (0.10-0.25 V vs. RHE) to evaluate the electrochemical double-layer capacitance (Cdl) for the as-synthesized electrocatalysts.

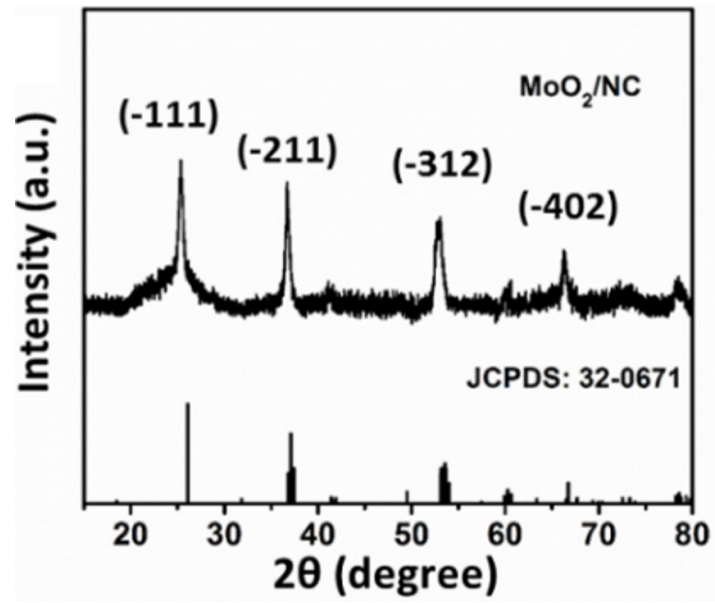

Figure S1. XRD pattern of the MoO<sub>2</sub>/NC.

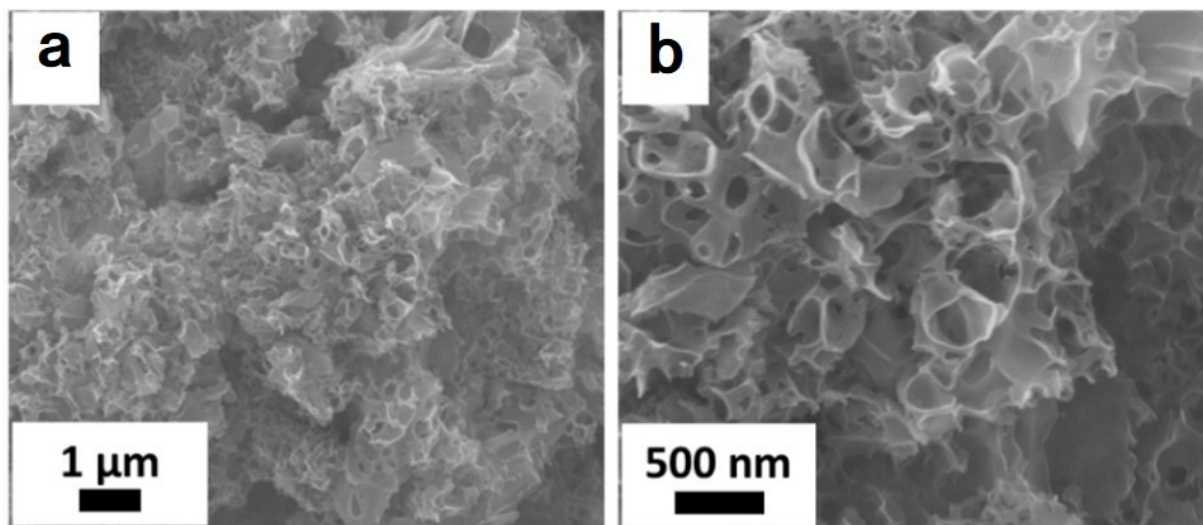

**Figure S2.** SEM images of the MoO<sub>2</sub>/NC.

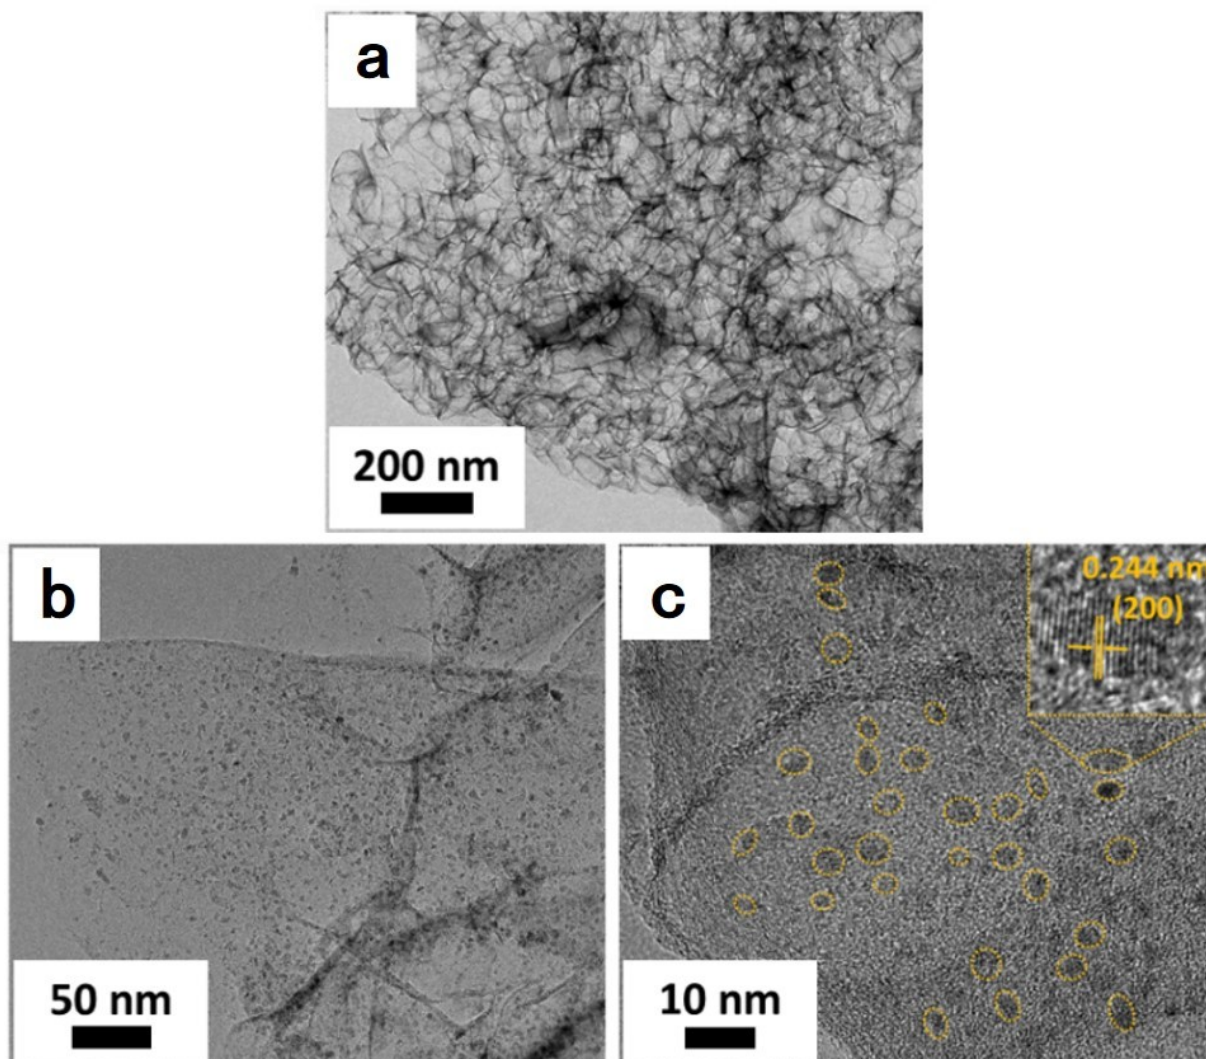

**Figure S3.** TEM images of the MoO<sub>2</sub>/NC.

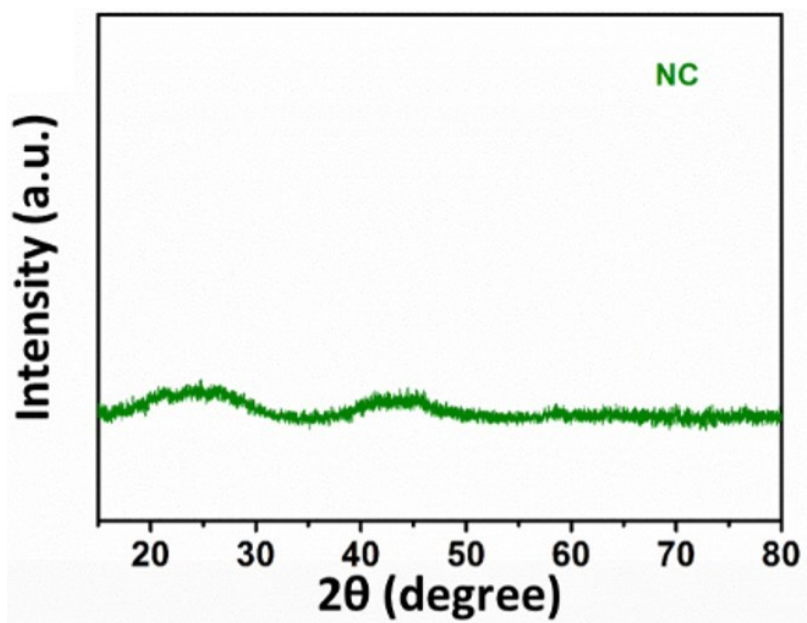

Figure S4. XRD pattern of the NC.

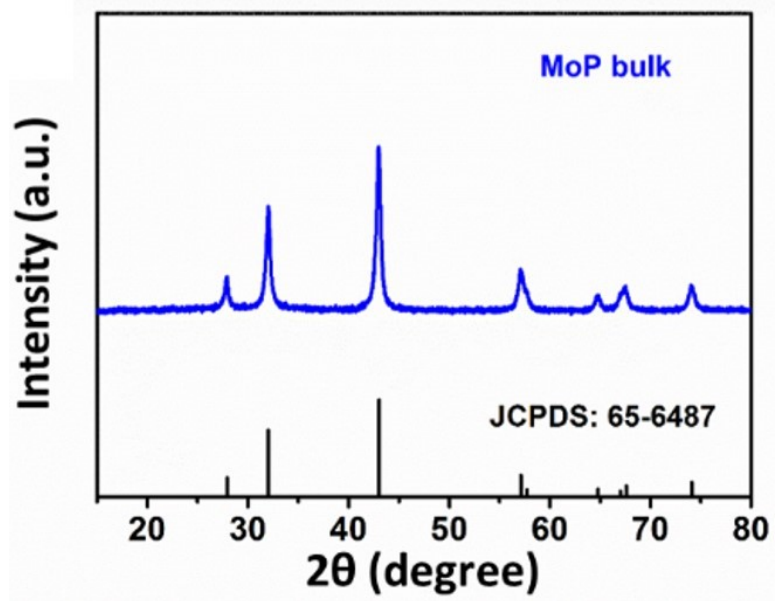

**Figure S5.** XRD pattern of the MoP bulk.



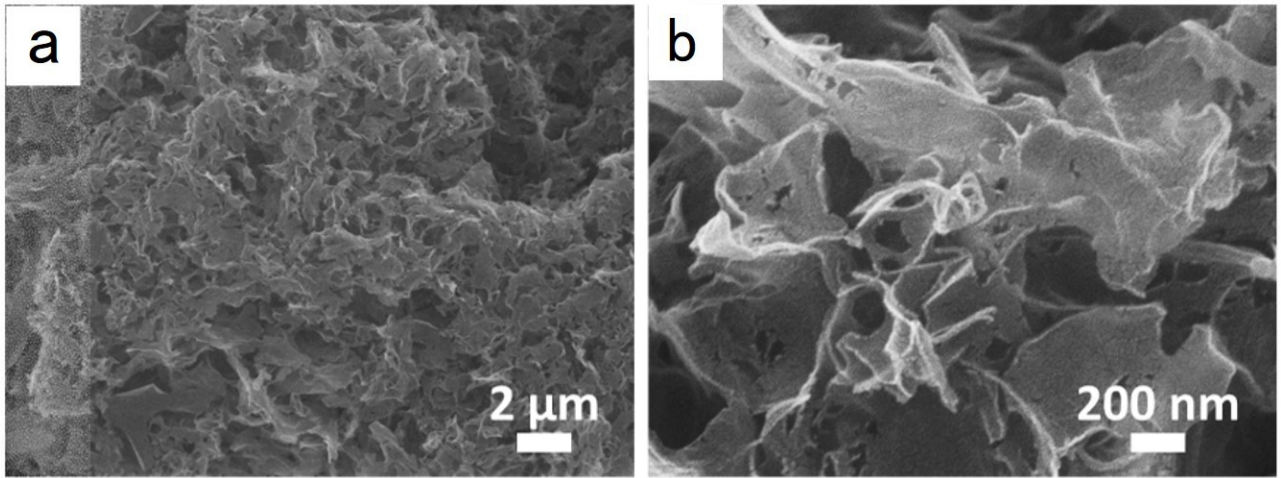

**Figure S6.** SEM images of the NC.

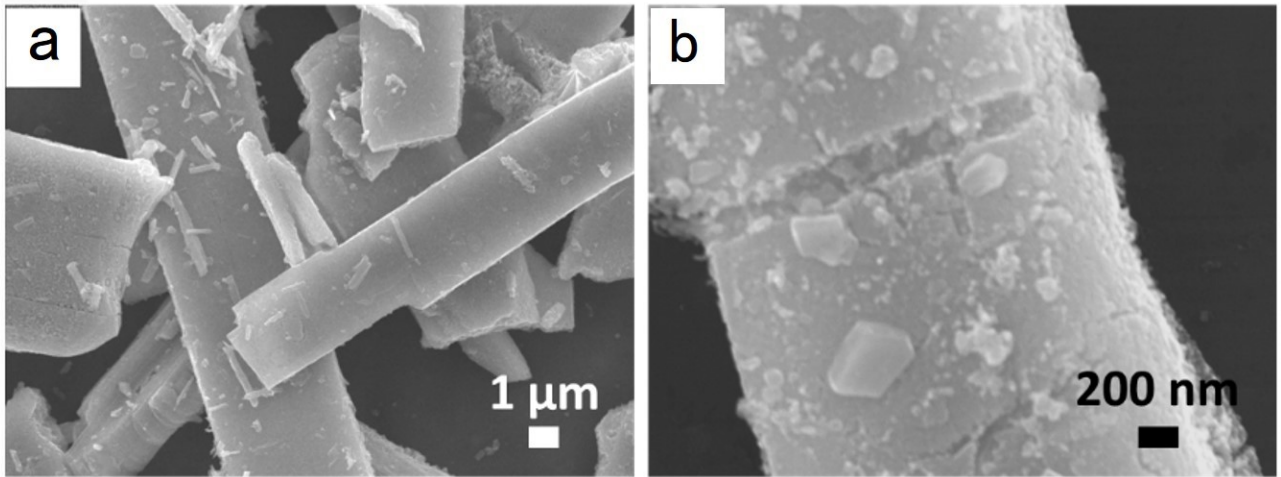

**Figure S7.** SEM images of the MoP bulk.

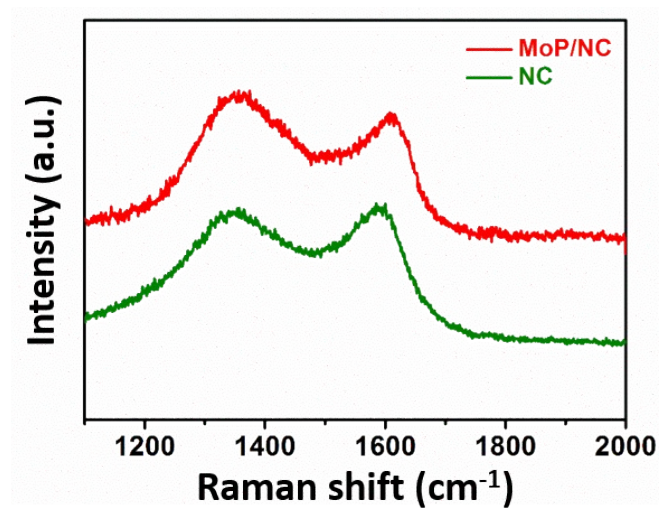

**Figure S8.** Raman spectra of the MoP/NC and NC.

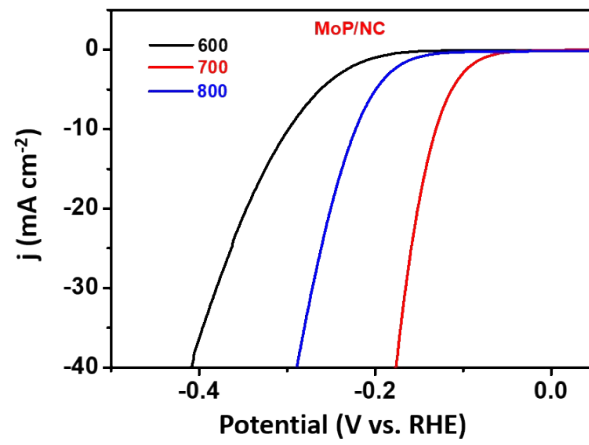

**Figure S9.** LSVs of the MoP/NC obtained at different phosphorization temperatures in 0.5 M H<sub>2</sub>SO<sub>4</sub>.

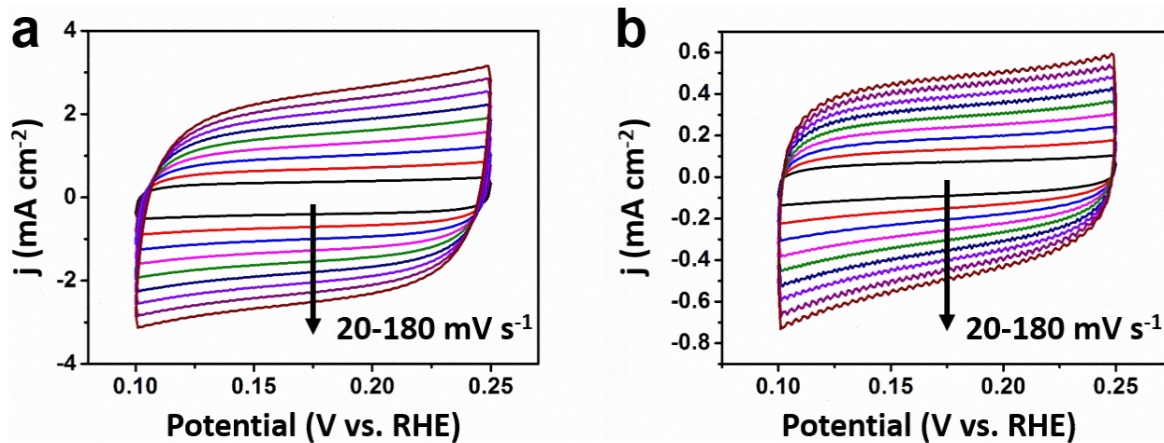

**Figure S10.** CVs of the MoP/NC and MoP bulk with different scanning rates from 20 to 180 mV s<sup>-1</sup> at a potential range of 0.1-0.25 V in 0.5 M H<sub>2</sub>SO<sub>4</sub>.

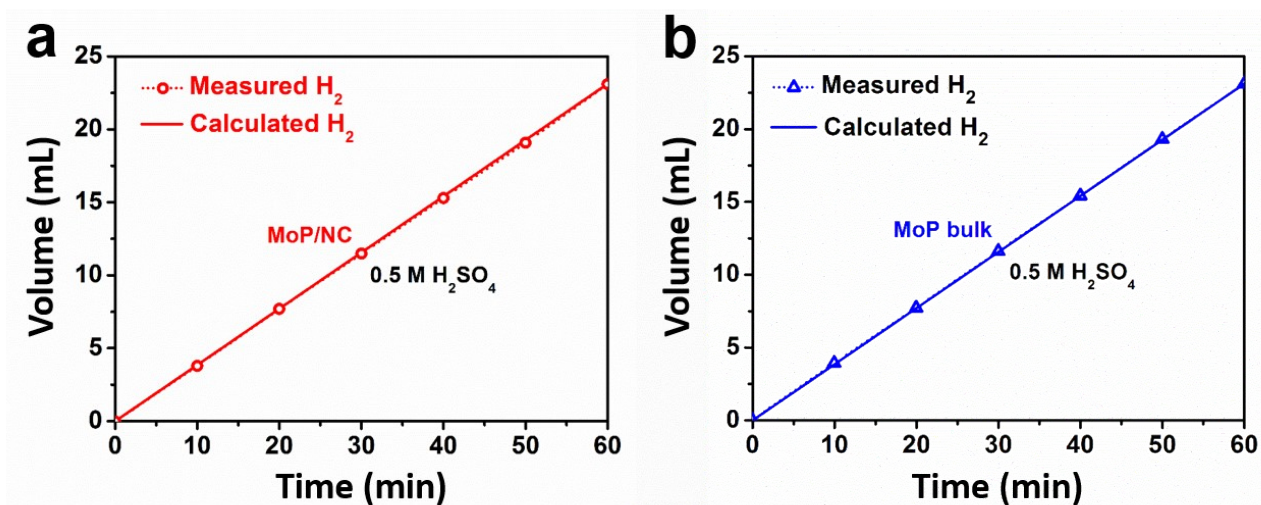

**Figure S11.** The theoretically calculated and experimentally measured amount of H<sub>2</sub> during the electrochemical test with the drainage gas-collecting method in 0.5 M H<sub>2</sub>SO<sub>4</sub> for the (a) MoP/NC and (b) MoP bulk.

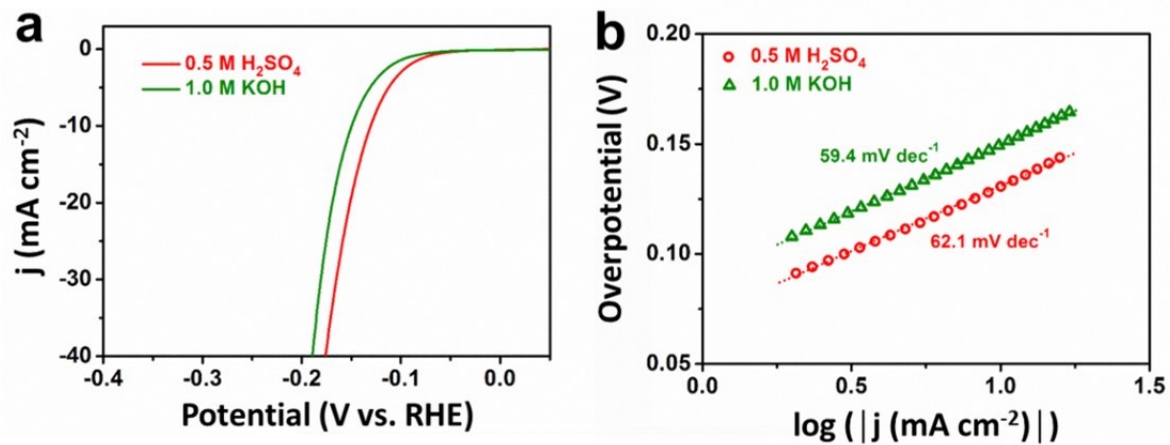

**Figure S12.** (a) LSVs and (b) Tafel plots of the MoP/NC in 0.5 M H<sub>2</sub>SO<sub>4</sub> and 1 M KOH.

**Table S1.** Elemental analysis result of MoP/NC.

| Sample mass (mg) | N (wt. %) | C (wt. %) | H (wt. %) | S (wt. %) |
|------------------|-----------|-----------|-----------|-----------|
| 1.975            | 1.16      | 31.31     | 0.00      | 0.00      |

**Table S2.** Mass fraction and atomic ratio of Mo and P in MoP/NC obtained by ICP-AES.

| Sample | Mo (wt. %) | P (wt. %) | Ratio of Mo to P |
|--------|------------|-----------|------------------|
| MoP/NC | 43.19      | 14.03     | 0.99             |



**Table 3.** Comparison of the HER activity between MoP/NC and other reported MoP-based carbonaceous hybrid under acidic and alkaline condition.

| Catalyst      | Media                                    | $\eta_{10}$<br>(mV) | Tafel slope<br>(mV dec <sup>-1</sup> ) | Reference        |
|---------------|------------------------------------------|---------------------|----------------------------------------|------------------|
| <b>MoP/NC</b> | <b>0.5 M H<sub>2</sub>SO<sub>4</sub></b> | <b>130</b>          | <b>62.1</b>                            | <b>this work</b> |
| MoP-QDs@PC    | 0.5 M H <sub>2</sub> SO <sub>4</sub>     | 118.8               | 59                                     | [S1]             |
| MoP@NPC/CNT   | 0.5 M H <sub>2</sub> SO <sub>4</sub>     | 155                 | 76                                     | [S2]             |
| MoP NPs@NC    | 0.5 M H <sub>2</sub> SO <sub>4</sub>     | 115                 | 65                                     | [S3]             |
| MoP/rGO       | 0.5 M H <sub>2</sub> SO <sub>4</sub>     | 117                 | 62                                     | [S4]             |
| MoP/MWCNTs    | 0.5 M H <sub>2</sub> SO <sub>4</sub>     | 109                 | 56.5                                   | [S5]             |
| MoP@NPCS      | 0.5 M H <sub>2</sub> SO <sub>4</sub>     | 113                 | 58                                     | [S6]             |
| <b>MoP/NC</b> | <b>1.0 M KOH</b>                         | <b>150</b>          | <b>59.4</b>                            | <b>this work</b> |
| MoP-QDs@PC    | 1.0 M KOH                                | 98.8                | 66                                     | [S1]             |
| MoP@NPC/CNT   | 1.0 M KOH                                | 131                 | 73                                     | [S2]             |
| N/C/MoP       | 1.0 M KOH                                | 169                 | 51.3                                   | [S7]             |
| MoP/rGO       | 1.0 M KOH                                | 150                 | 66                                     | [S4]             |
| MoP/MWCNTs    | 1.0 M KOH                                | 155                 | 56.8                                   | [S5]             |
| MoP@NC        | 1.0 M KOH                                | 149                 | 55.9                                   | [S8]             |

## References

- S1. Liu Y, Yue C, Sun F, et al. Superhydrophilic molybdenum phosphide quantum dots on porous carbon matrix for boosting hydrogen evolution reaction[J]. *Chemical Engineering Journal*, 2023, 454: 140105.
- S2. Chen Y, Jiang T, Tian C, et al. Molybdenum Phosphide Quantum Dots Encapsulated by P/N-Doped Carbon for Hydrogen Evolution Reaction in Acid and Alkaline Electrolytes[J]. *ChemSusChem*, 2023, 16(20): e202300479.
- S3. Pu Z, Amiin I S, Liu X, et al. Ultrastable nitrogen-doped carbon encapsulating molybdenum phosphide nanoparticles as highly efficient electrocatalyst for hydrogen generation[J]. *Nanoscale*, 2016, 8(39): 17256-17261.
- S4. Wu Z, Wang J, Zhu J, et al. Highly efficient and stable MoP-RGO nanoparticles as electrocatalysts for hydrogen evolution[J]. *Electrochimica Acta*, 2017, 232: 254-261.
- S5. Xiao W, Li X, Fu C, et al. Morphology and distribution of in-situ grown MoP nanoparticles on carbon nanotubes to enhance hydrogen evolution reaction[J]. *Journal of Alloys and Compounds*, 2021, 877: 160214.
- S6. Ren J T, Chen L, Yang D D, et al. Molybdenum-based nanoparticles (Mo<sub>2</sub>C, MoP and MoS<sub>2</sub>) coupled heteroatoms-doped carbon nanosheets for efficient hydrogen evolution reaction[J]. *Applied Catalysis B: Environmental*, 2020, 263: 118352.
- S7. Wang C, Li W, Wang X, et al. Open N-doped carbon coated porous molybdenum phosphide nanorods for synergistic catalytic hydrogen evolution reaction[J]. *Nano Research*, 2022, 15(3): 1824-1830.
- S8. Pi C, Huang C, Yang Y, et al. In situ formation of N-doped carbon-coated porous MoP nanowires: a highly efficient electrocatalyst for hydrogen evolution reaction in a wide pH range[J]. *Applied Catalysis B: Environmental*, 2020, 263: 118358.
